# Supplementary material for: Theoretical characterisation of strand cross-correlation in ChIP-seq
Source: BMC Bioinformatics. 2020 Sep 22;21:417. doi: 10.1186/s12859-020-03729-6 (PMC7510163; doi:10.1186/s12859-020-03729-6)
Supplement: Supplementary file 4 — Additional file 4 The list of additionally analysed ChIP-seq experiments obtained from ENCODE and Roadmap project. [file 12859_2020_3729_MOESM4_ESM.xlsx]

## Sheet: Sheet1
Table S2. List of additionally analysed ChIP-seq experiments obtained from ENCODE and Roadmap project.
experiment_accession	project	lab	biological_replicate_number	technical_replicate_number	biosample_name	target	read_length	href	control
ENCSR000AKP	ENCODE2	Broad Institute	1	1	K562	H3K27ac	36	/files/ENCFF000BXH/@@download/ENCFF000BXH.fastq.gz	["ENCSR000AKY"]
ENCSR000AKP	ENCODE2	Broad Institute	2	1	K562	H3K27ac	36	/files/ENCFF000BXG/@@download/ENCFF000BXG.fastq.gz	["ENCSR000AKY"]
ENCSR000AKQ	ENCODE2	Broad Institute	1	1	K562	H3K27me3	51	/files/ENCFF000BXP/@@download/ENCFF000BXP.fastq.gz	["ENCSR000AKY"]
ENCSR000AKQ	ENCODE2	Broad Institute	2	1	K562	H3K27me3	36	/files/ENCFF000BXN/@@download/ENCFF000BXN.fastq.gz	["ENCSR000AKY"]
ENCSR000AKR	ENCODE2	Broad Institute	1	1	K562	H3K36me3	36	/files/ENCFF000BXR/@@download/ENCFF000BXR.fastq.gz	["ENCSR000AKY"]
ENCSR000AKR	ENCODE2	Broad Institute	2	1	K562	H3K36me3	36	/files/ENCFF000BXO/@@download/ENCFF000BXO.fastq.gz	["ENCSR000AKY"]
ENCSR000AKS	ENCODE2	Broad Institute	1	1	K562	H3K4me1	36	/files/ENCFF000BXX/@@download/ENCFF000BXX.fastq.gz	["ENCSR000AKY"]
ENCSR000AKS	ENCODE2	Broad Institute	2	1	K562	H3K4me1	51	/files/ENCFF000BYG/@@download/ENCFF000BYG.fastq.gz	["ENCSR000AKY"]
ENCSR000AKT	ENCODE2	Broad Institute	1	1	K562	H3K4me2	36	/files/ENCFF000BYA/@@download/ENCFF000BYA.fastq.gz	["ENCSR000AKY"]
ENCSR000AKT	ENCODE2	Broad Institute	2	1	K562	H3K4me2	51	/files/ENCFF000BYF/@@download/ENCFF000BYF.fastq.gz	["ENCSR000AKY"]
ENCSR000AKU	ENCODE2	Broad Institute	1	1	K562	H3K4me3	51	/files/ENCFF000BYJ/@@download/ENCFF000BYJ.fastq.gz	["ENCSR000AKY"]
ENCSR000AKU	ENCODE2	Broad Institute	2	1	K562	H3K4me3	51	/files/ENCFF000BYI/@@download/ENCFF000BYI.fastq.gz	["ENCSR000AKY"]
ENCSR000AKV	ENCODE2	Broad Institute	1	1	K562	H3K9ac	51	/files/ENCFF001QWV/@@download/ENCFF001QWV.fastq.gz	["ENCSR000AKY"]
ENCSR000AKV	ENCODE2	Broad Institute	2	1	K562	H3K9ac	47	/files/ENCFF000BYW/@@download/ENCFF000BYW.fastq.gz	["ENCSR000AKY"]
ENCSR000AKY	ENCODE2	Broad Institute	3	1	K562	Control	36	/files/ENCFF156ECZ/@@download/ENCFF156ECZ.fastq.gz	[]
ENCSR000AKY	ENCODE2	Broad Institute	3	1	K562	Control	36	/files/ENCFF561WFK/@@download/ENCFF561WFK.fastq.gz	[]
ENCSR000AKY	ENCODE2	Broad Institute	1	1	K562	Control	36	/files/ENCFF000BWK/@@download/ENCFF000BWK.fastq.gz	[]
ENCSR000AKY	ENCODE2	Broad Institute	2	2	K562	Control	36	/files/ENCFF994FIB/@@download/ENCFF994FIB.fastq.gz	[]
ENCSR000AKY	ENCODE2	Broad Institute	2	2	K562	Control	36	/files/ENCFF283HQV/@@download/ENCFF283HQV.fastq.gz	[]
ENCSR000ALU	ENCODE2	Broad Institute	1	1	H1	H3K27me3	36	/files/ENCFF000AWX/@@download/ENCFF000AWX.fastq.gz	["ENCSR000AMI"]
ENCSR000ALU	ENCODE2	Broad Institute	2	2	H1	H3K27me3	36	/files/ENCFF000AWY/@@download/ENCFF000AWY.fastq.gz	["ENCSR000AMI"]
ENCSR000ALW	ENCODE2	Broad Institute	1	1	mammary epithelial cell	H3K27ac	36	/files/ENCFF000BIL/@@download/ENCFF000BIL.fastq.gz	["ENCSR000AMN"]
ENCSR000ALW	ENCODE2	Broad Institute	2	1	mammary epithelial cell	H3K27ac	36	/files/ENCFF000BIM/@@download/ENCFF000BIM.fastq.gz	["ENCSR000AMN"]
ENCSR000ALX	ENCODE2	Broad Institute	1	1	mammary epithelial cell	H3K27me3	36	/files/ENCFF000BIR/@@download/ENCFF000BIR.fastq.gz	["ENCSR000AMN"]
ENCSR000ALX	ENCODE2	Broad Institute	2	1	mammary epithelial cell	H3K27me3	36	/files/ENCFF000BIT/@@download/ENCFF000BIT.fastq.gz	["ENCSR000AMN"]
ENCSR000ALY	ENCODE2	Broad Institute	1	1	mammary epithelial cell	H3K36me3	36	/files/ENCFF000BIS/@@download/ENCFF000BIS.fastq.gz	["ENCSR000AMN"]
ENCSR000ALY	ENCODE2	Broad Institute	2	1	mammary epithelial cell	H3K36me3	36	/files/ENCFF000BIY/@@download/ENCFF000BIY.fastq.gz	["ENCSR000AMN"]
ENCSR000ALZ	ENCODE2	Broad Institute	1	1	mammary epithelial cell	H3K9ac	36	/files/ENCFF000BKB/@@download/ENCFF000BKB.fastq.gz	["ENCSR000AMN"]
ENCSR000ALZ	ENCODE2	Broad Institute	2	1	mammary epithelial cell	H3K9ac	36	/files/ENCFF000BJX/@@download/ENCFF000BJX.fastq.gz	["ENCSR000AMN"]
ENCSR000AMG	ENCODE2	Broad Institute	1	1	H1	H3K4me3	36	/files/ENCFF000AXS/@@download/ENCFF000AXS.fastq.gz	["ENCSR000AMI"]
ENCSR000AMG	ENCODE2	Broad Institute	2	1	H1	H3K4me3	36	/files/ENCFF000AXZ/@@download/ENCFF000AXZ.fastq.gz	["ENCSR000AMI"]
ENCSR000AMI	ENCODE2	Broad Institute	2	7	H1	Control	36	/files/ENCFF064XIS/@@download/ENCFF064XIS.fastq.gz	[]
ENCSR000AMI	ENCODE2	Broad Institute	2	7	H1	Control	36	/files/ENCFF393KUX/@@download/ENCFF393KUX.fastq.gz	[]
ENCSR000AMI	ENCODE2	Broad Institute	3	2	H1	Control	76	/files/ENCFF740ECI/@@download/ENCFF740ECI.fastq.gz	[]
ENCSR000AMI	ENCODE2	Broad Institute	3	2	H1	Control	76	/files/ENCFF805KPU/@@download/ENCFF805KPU.fastq.gz	[]
ENCSR000AMI	ENCODE2	Broad Institute	2	6	H1	Control	36	/files/ENCFF138KKQ/@@download/ENCFF138KKQ.fastq.gz	[]
ENCSR000AMI	ENCODE2	Broad Institute	2	6	H1	Control	36	/files/ENCFF368CYL/@@download/ENCFF368CYL.fastq.gz	[]
ENCSR000AMI	ENCODE2	Broad Institute	4	1	H1	Control	76	/files/ENCFF663FLW/@@download/ENCFF663FLW.fastq.gz	[]
ENCSR000AMI	ENCODE2	Broad Institute	4	1	H1	Control	76	/files/ENCFF689EIT/@@download/ENCFF689EIT.fastq.gz	[]
ENCSR000AMI	ENCODE2	Broad Institute	3	1	H1	Control	76	/files/ENCFF164ZWM/@@download/ENCFF164ZWM.fastq.gz	[]
ENCSR000AMI	ENCODE2	Broad Institute	3	1	H1	Control	76	/files/ENCFF809ZPN/@@download/ENCFF809ZPN.fastq.gz	[]
ENCSR000AMI	ENCODE2	Broad Institute	2	1	H1	Control	36	/files/ENCFF303YPV/@@download/ENCFF303YPV.fastq.gz	[]
ENCSR000AMI	ENCODE2	Broad Institute	2	3	H1	Control	36	/files/ENCFF145GCJ/@@download/ENCFF145GCJ.fastq.gz	[]
ENCSR000AMI	ENCODE2	Broad Institute	2	3	H1	Control	36	/files/ENCFF508ZFI/@@download/ENCFF508ZFI.fastq.gz	[]
ENCSR000AMI	ENCODE2	Broad Institute	2	2	H1	Control	36	/files/ENCFF659UFR/@@download/ENCFF659UFR.fastq.gz	[]
ENCSR000AMI	ENCODE2	Broad Institute	2	2	H1	Control	36	/files/ENCFF763DAQ/@@download/ENCFF763DAQ.fastq.gz	[]
ENCSR000AMI	ENCODE2	Broad Institute	2	5	H1	Control	36	/files/ENCFF635VQA/@@download/ENCFF635VQA.fastq.gz	[]
ENCSR000AMI	ENCODE2	Broad Institute	2	5	H1	Control	36	/files/ENCFF472QMD/@@download/ENCFF472QMD.fastq.gz	[]
ENCSR000AMI	ENCODE2	Broad Institute	1	1	H1	Control	36	/files/ENCFF036EGF/@@download/ENCFF036EGF.fastq.gz	[]
ENCSR000AMI	ENCODE2	Broad Institute	1	1	H1	Control	36	/files/ENCFF191QXK/@@download/ENCFF191QXK.fastq.gz	[]
ENCSR000AMJ	ENCODE2	Broad Institute	1	1	mammary epithelial cell	H3K4me1	36	/files/ENCFF000BJD/@@download/ENCFF000BJD.fastq.gz	["ENCSR000AMN"]
ENCSR000AMJ	ENCODE2	Broad Institute	2	1	mammary epithelial cell	H3K4me1	36	/files/ENCFF000BJE/@@download/ENCFF000BJE.fastq.gz	["ENCSR000AMN"]
ENCSR000AMK	ENCODE2	Broad Institute	1	1	mammary epithelial cell	H3K4me2	36	/files/ENCFF000BJF/@@download/ENCFF000BJF.fastq.gz	["ENCSR000AMN"]
ENCSR000AMK	ENCODE2	Broad Institute	2	1	mammary epithelial cell	H3K4me2	36	/files/ENCFF000BJJ/@@download/ENCFF000BJJ.fastq.gz	["ENCSR000AMN"]
ENCSR000AML	ENCODE2	Broad Institute	1	1	mammary epithelial cell	H3K4me3	36	/files/ENCFF000BJO/@@download/ENCFF000BJO.fastq.gz	["ENCSR000AMN"]
ENCSR000AML	ENCODE2	Broad Institute	2	1	mammary epithelial cell	H3K4me3	36	/files/ENCFF000BJN/@@download/ENCFF000BJN.fastq.gz	["ENCSR000AMN"]
ENCSR000AMN	ENCODE2	Broad Institute	1	2	mammary epithelial cell	Control	36	/files/ENCFF556RIX/@@download/ENCFF556RIX.fastq.gz	[]
ENCSR000AMN	ENCODE2	Broad Institute	1	2	mammary epithelial cell	Control	36	/files/ENCFF749GHL/@@download/ENCFF749GHL.fastq.gz	[]
ENCSR000AMN	ENCODE2	Broad Institute	1	2	mammary epithelial cell	Control	36	/files/ENCFF913IHA/@@download/ENCFF913IHA.fastq.gz	[]
ENCSR000AMN	ENCODE2	Broad Institute	1	2	mammary epithelial cell	Control	36	/files/ENCFF788YKS/@@download/ENCFF788YKS.fastq.gz	[]
ENCSR000AMN	ENCODE2	Broad Institute	1	1	mammary epithelial cell	Control	36	/files/ENCFF000BHE/@@download/ENCFF000BHE.fastq.gz	[]
ENCSR000AMN	ENCODE2	Broad Institute	2	1	mammary epithelial cell	Control	36	/files/ENCFF000BHF/@@download/ENCFF000BHF.fastq.gz	[]
ENCSR000AMN	ENCODE2	Broad Institute	2	2	mammary epithelial cell	Control	36	/files/ENCFF152UJF/@@download/ENCFF152UJF.fastq.gz	[]
ENCSR000AMN	ENCODE2	Broad Institute	2	2	mammary epithelial cell	Control	36	/files/ENCFF702WJD/@@download/ENCFF702WJD.fastq.gz	[]
ENCSR000ANA	ENCODE2	Broad Institute	1	1	H1	H3K4me1	36	/files/ENCFF000AXJ/@@download/ENCFF000AXJ.fastq.gz	["ENCSR000AMI"]
ENCSR000ANA	ENCODE2	Broad Institute	2	2	H1	H3K4me1	36	/files/ENCFF000AXM/@@download/ENCFF000AXM.fastq.gz	["ENCSR000AMI"]
ENCSR000ANB	ENCODE2	Broad Institute	1	1	H1	H3K36me3	36	/files/ENCFF000AXG/@@download/ENCFF000AXG.fastq.gz	["ENCSR000AMI"]
ENCSR000ANB	ENCODE2	Broad Institute	2	2	H1	H3K36me3	36	/files/ENCFF000AXH/@@download/ENCFF000AXH.fastq.gz	["ENCSR000AMI"]
ENCSR000ANC	ENCODE2	Broad Institute	1	1	H1	H3K4me2	36	/files/ENCFF000AXR/@@download/ENCFF000AXR.fastq.gz	["ENCSR000AMI"]
ENCSR000ANC	ENCODE2	Broad Institute	2	1	H1	H3K4me2	36	/files/ENCFF000AXQ/@@download/ENCFF000AXQ.fastq.gz	["ENCSR000AMI"]
ENCSR000AND	ENCODE2	Broad Institute	1	1	H1	H3K9ac	36	/files/ENCFF000AYG/@@download/ENCFF000AYG.fastq.gz	["ENCSR000AMI"]
ENCSR000AND	ENCODE2	Broad Institute	2	2	H1	H3K9ac	36	/files/ENCFF000AYH/@@download/ENCFF000AYH.fastq.gz	["ENCSR000AMI"]
ENCSR000ANP	ENCODE2	Broad Institute	1	1	H1	H3K27ac	36	/files/ENCFF000AWR/@@download/ENCFF000AWR.fastq.gz	["ENCSR000AMI"]
ENCSR000ANP	ENCODE2	Broad Institute	2	2	H1	H3K27ac	36	/files/ENCFF000AWV/@@download/ENCFF000AWV.fastq.gz	["ENCSR000AMI"]
ENCSR000APC	ENCODE2	Broad Institute	1	1	K562	H2AFZ	36	/files/ENCFF000BWU/@@download/ENCFF000BWU.fastq.gz	["ENCSR000AKY"]
ENCSR000APC	ENCODE2	Broad Institute	2	1	K562	H2AFZ	36	/files/ENCFF000BWV/@@download/ENCFF000BWV.fastq.gz	["ENCSR000AKY"]
ENCSR000APD	ENCODE2	Broad Institute	1	1	K562	H3K79me2	36	/files/ENCFF000BYO/@@download/ENCFF000BYO.fastq.gz	["ENCSR000AKY"]
ENCSR000APD	ENCODE2	Broad Institute	2	1	K562	H3K79me2	36	/files/ENCFF000BYS/@@download/ENCFF000BYS.fastq.gz	["ENCSR000AKY"]
ENCSR000APE	ENCODE2	Broad Institute	1	1	K562	H3K9me3	36	/files/ENCFF001QWW/@@download/ENCFF001QWW.fastq.gz	["ENCSR000AKY"]
ENCSR000APE	ENCODE2	Broad Institute	2	1	K562	H3K9me3	36	/files/ENCFF001QWX/@@download/ENCFF001QWX.fastq.gz	["ENCSR000AKY"]
ENCSR000APX	ENCODE2	Broad Institute	1	1	H1	H2AFZ	36	/files/ENCFF000AWJ/@@download/ENCFF000AWJ.fastq.gz	["ENCSR000AMI"]
ENCSR000APX	ENCODE2	Broad Institute	2	2	H1	H2AFZ	36	/files/ENCFF000AWI/@@download/ENCFF000AWI.fastq.gz	["ENCSR000AMI"]
ENCSR000APY	ENCODE2	Broad Institute	1	1	H1	H3K79me2	36	/files/ENCFF000AYD/@@download/ENCFF000AYD.fastq.gz	["ENCSR000AMI"]
ENCSR000APY	ENCODE2	Broad Institute	2	2	H1	H3K79me2	36	/files/ENCFF000AYF/@@download/ENCFF000AYF.fastq.gz	["ENCSR000AMI"]
ENCSR000APZ	ENCODE2	Broad Institute	1	1	H1	H3K9me3	36	/files/ENCFF000AWP/@@download/ENCFF000AWP.fastq.gz	["ENCSR000AMI"]
ENCSR000APZ	ENCODE2	Broad Institute	2	1	H1	H3K9me3	36	/files/ENCFF000AWO/@@download/ENCFF000AWO.fastq.gz	["ENCSR000AMI"]
ENCSR000ARF	ENCODE2	Broad Institute	1	1	mammary epithelial cell	H2AFZ	36	/files/ENCFF000BHX/@@download/ENCFF000BHX.fastq.gz	["ENCSR000AMN"]
ENCSR000ARF	ENCODE2	Broad Institute	2	1	mammary epithelial cell	H2AFZ	36	/files/ENCFF000BHW/@@download/ENCFF000BHW.fastq.gz	["ENCSR000AMN"]
ENCSR000ARG	ENCODE2	Broad Institute	1	1	mammary epithelial cell	H3K9me3	36	/files/ENCFF000BIF/@@download/ENCFF000BIF.fastq.gz	["ENCSR000AMN"]
ENCSR000ARG	ENCODE2	Broad Institute	2	1	mammary epithelial cell	H3K9me3	36	/files/ENCFF000BIC/@@download/ENCFF000BIC.fastq.gz	["ENCSR000AMN"]
ENCSR000ASB	ENCODE2	Broad Institute	1	1	mammary epithelial cell	H3K79me2	36	/files/ENCFF000BJV/@@download/ENCFF000BJV.fastq.gz	["ENCSR000AMN"]
ENCSR000ASB	ENCODE2	Broad Institute	2	1	mammary epithelial cell	H3K79me2	36	/files/ENCFF000BJT/@@download/ENCFF000BJT.fastq.gz	["ENCSR000AMN"]
ENCSR000ASI	ENCODE2	Broad Institute	1	1	CD14-positive monocyte	H2AFZ	36	/files/ENCFF000CDE/@@download/ENCFF000CDE.fastq.gz	["ENCSR000AUU"]
ENCSR000ASI	ENCODE2	Broad Institute	2	1	CD14-positive monocyte	H2AFZ	36	/files/ENCFF000CDF/@@download/ENCFF000CDF.fastq.gz	["ENCSR000AUU"]
ENCSR000ASJ	ENCODE2	Broad Institute	1	1	CD14-positive monocyte	H3K27ac	36	/files/ENCFF000CEN/@@download/ENCFF000CEN.fastq.gz	["ENCSR000AUU"]
ENCSR000ASJ	ENCODE2	Broad Institute	2	1	CD14-positive monocyte	H3K27ac	36	/files/ENCFF000CEO/@@download/ENCFF000CEO.fastq.gz	["ENCSR000AUU"]
ENCSR000ASK	ENCODE2	Broad Institute	1	1	CD14-positive monocyte	H3K27me3	36	/files/ENCFF000CEV/@@download/ENCFF000CEV.fastq.gz	["ENCSR000AUU"]
ENCSR000ASK	ENCODE2	Broad Institute	2	1	CD14-positive monocyte	H3K27me3	36	/files/ENCFF000CEU/@@download/ENCFF000CEU.fastq.gz	["ENCSR000AUU"]
ENCSR000ASL	ENCODE2	Broad Institute	1	1	CD14-positive monocyte	H3K36me3	36	/files/ENCFF000CFA/@@download/ENCFF000CFA.fastq.gz	["ENCSR000AUU"]
ENCSR000ASL	ENCODE2	Broad Institute	2	1	CD14-positive monocyte	H3K36me3	36	/files/ENCFF000CFB/@@download/ENCFF000CFB.fastq.gz	["ENCSR000AUU"]
ENCSR000ASM	ENCODE2	Broad Institute	1	1	CD14-positive monocyte	H3K4me1	36	/files/ENCFF000CDL/@@download/ENCFF000CDL.fastq.gz	["ENCSR000AUU"]
ENCSR000ASM	ENCODE2	Broad Institute	2	1	CD14-positive monocyte	H3K4me1	36	/files/ENCFF000CDK/@@download/ENCFF000CDK.fastq.gz	["ENCSR000AUU"]
ENCSR000ASN	ENCODE2	Broad Institute	1	2	CD14-positive monocyte	H3K4me3	36	/files/ENCFF399MSH/@@download/ENCFF399MSH.fastq.gz	["ENCSR000AUU"]
ENCSR000ASN	ENCODE2	Broad Institute	1	1	CD14-positive monocyte	H3K4me3	36	/files/ENCFF000CDX/@@download/ENCFF000CDX.fastq.gz	["ENCSR000AUU"]
ENCSR000ASN	ENCODE2	Broad Institute	2	1	CD14-positive monocyte	H3K4me3	36	/files/ENCFF000CDZ/@@download/ENCFF000CDZ.fastq.gz	["ENCSR000AUU"]
ENCSR000ASO	ENCODE2	Broad Institute	1	1	CD14-positive monocyte	H3K79me2	36	/files/ENCFF000CFG/@@download/ENCFF000CFG.fastq.gz	["ENCSR000AUU"]
ENCSR000ASO	ENCODE2	Broad Institute	2	1	CD14-positive monocyte	H3K79me2	36	/files/ENCFF000CFH/@@download/ENCFF000CFH.fastq.gz	["ENCSR000AUU"]
ENCSR000ASP	ENCODE2	Broad Institute	1	1	CD14-positive monocyte	H3K9me3	36	/files/ENCFF000CEI/@@download/ENCFF000CEI.fastq.gz	["ENCSR000AUU"]
ENCSR000ASP	ENCODE2	Broad Institute	2	1	CD14-positive monocyte	H3K9me3	36	/files/ENCFF000CEJ/@@download/ENCFF000CEJ.fastq.gz	["ENCSR000AUU"]
ENCSR000ATE	ENCODE2	Broad Institute	1	1	CD14-positive monocyte	H3K4me2	36	/files/ENCFF000CDR/@@download/ENCFF000CDR.fastq.gz	["ENCSR000AUU"]
ENCSR000ATE	ENCODE2	Broad Institute	2	1	CD14-positive monocyte	H3K4me2	36	/files/ENCFF000CDS/@@download/ENCFF000CDS.fastq.gz	["ENCSR000AUU"]
ENCSR000ATF	ENCODE2	Broad Institute	1	1	CD14-positive monocyte	H3K9ac	36	/files/ENCFF000CED/@@download/ENCFF000CED.fastq.gz	["ENCSR000AUU"]
ENCSR000ATF	ENCODE2	Broad Institute	2	1	CD14-positive monocyte	H3K9ac	36	/files/ENCFF000CEC/@@download/ENCFF000CEC.fastq.gz	["ENCSR000AUU"]
ENCSR000AUU	ENCODE2	Broad Institute	3	1	CD14-positive monocyte	Control	36	/files/ENCFF692GVG/@@download/ENCFF692GVG.fastq.gz	[]
ENCSR000AUU	ENCODE2	Broad Institute	3	1	CD14-positive monocyte	Control	36	/files/ENCFF244XQF/@@download/ENCFF244XQF.fastq.gz	[]
ENCSR000AUU	ENCODE2	Broad Institute	1	1	CD14-positive monocyte	Control	36	/files/ENCFF000CCW/@@download/ENCFF000CCW.fastq.gz	[]
ENCSR000AUU	ENCODE2	Broad Institute	2	1	CD14-positive monocyte	Control	36	/files/ENCFF000CCQ/@@download/ENCFF000CCQ.fastq.gz	[]
ENCSR000DUQ	ENCODE2	University of Washington	1	1	mammary epithelial cell	H3K4me3	36	/files/ENCFF001FOG/@@download/ENCFF001FOG.fastq.gz	["ENCSR000DUR"]
ENCSR000DUQ	ENCODE2	University of Washington	2	1	mammary epithelial cell	H3K4me3	36	/files/ENCFF001FOH/@@download/ENCFF001FOH.fastq.gz	["ENCSR000DUR"]
ENCSR000DUR	ENCODE2	University of Washington	1	1	mammary epithelial cell	Control	36	/files/ENCFF001HPU/@@download/ENCFF001HPU.fastq.gz	[]
ENCSR000DUT	ENCODE2	University of Washington	1	1	mammary epithelial cell	H3K27me3	36	/files/ENCFF001FOE/@@download/ENCFF001FOE.fastq.gz	["ENCSR000DUR"]
ENCSR000DWA	ENCODE2	University of Washington	1	1	K562	Control	36	/files/ENCFF001HTT/@@download/ENCFF001HTT.fastq.gz	[]
ENCSR000DWB	ENCODE2	University of Washington	1	1	K562	H3K36me3	36	/files/ENCFF001FWV/@@download/ENCFF001FWV.fastq.gz	["ENCSR000DWA"]
ENCSR000DWB	ENCODE2	University of Washington	2	1	K562	H3K36me3	36	/files/ENCFF001FWW/@@download/ENCFF001FWW.fastq.gz	["ENCSR000DWA"]
ENCSR000DWD	ENCODE2	University of Washington	1	1	K562	H3K4me3	36	/files/ENCFF001FXG/@@download/ENCFF001FXG.fastq.gz	["ENCSR000DWA"]
ENCSR000DWD	ENCODE2	University of Washington	2	1	K562	H3K4me3	36	/files/ENCFF001FXH/@@download/ENCFF001FXH.fastq.gz	["ENCSR000DWA"]
ENCSR000DWK	ENCODE2	University of Washington	1	1	CD14-positive monocyte	Control	36	/files/ENCFF001HUV/@@download/ENCFF001HUV.fastq.gz	[]
ENCSR000DWL	ENCODE2	University of Washington	1	1	CD14-positive monocyte	H3K4me3	36	/files/ENCFF001FYS/@@download/ENCFF001FYS.fastq.gz	["ENCSR000DWK"]
ENCSR000DWM	ENCODE2	University of Washington	1	1	CD14-positive monocyte	H3K27me3	36	/files/ENCFF001FYR/@@download/ENCFF001FYR.fastq.gz	["ENCSR000DWK"]
ENCSR000EVZ	ENCODE2	University of Southern California	1	1	K562	H3K9ac	36	/files/ENCFF000VEE/@@download/ENCFF000VEE.fastq.gz	["ENCSR000EWK"]
ENCSR000EVZ	ENCODE2	University of Southern California	2	1	K562	H3K9ac	36	/files/ENCFF000VEG/@@download/ENCFF000VEG.fastq.gz	["ENCSR000EWK"]
ENCSR000EWA	ENCODE2	University of Southern California	1	1	K562	H3K4me3	36	/files/ENCFF000VDX/@@download/ENCFF000VDX.fastq.gz	["ENCSR000EWK"]
ENCSR000EWA	ENCODE2	University of Southern California	2	1	K562	H3K4me3	36	/files/ENCFF000VDY/@@download/ENCFF000VDY.fastq.gz	["ENCSR000EWK"]
ENCSR000EWB	ENCODE2	University of Southern California	1	1	K562	H3K27me3	36	/files/ENCFF000VDN/@@download/ENCFF000VDN.fastq.gz	["ENCSR000EWK"]
ENCSR000EWB	ENCODE2	University of Southern California	2	1	K562	H3K27me3	36	/files/ENCFF000VDP/@@download/ENCFF000VDP.fastq.gz	["ENCSR000EWK"]
ENCSR000EWC	ENCODE2	University of Southern California	1	1	K562	H3K4me1	41	/files/ENCFF000VDV/@@download/ENCFF000VDV.fastq.gz	["ENCSR000EWK"]
ENCSR000EWC	ENCODE2	University of Southern California	2	1	K562	H3K4me1	41	/files/ENCFF000VDU/@@download/ENCFF000VDU.fastq.gz	["ENCSR000EWK"]
ENCSR000EWK	ENCODE2	University of Southern California	1	1	K562	Control	28	/files/ENCFF000VEK/@@download/ENCFF000VEK.fastq.gz	[]
ENCSR003SSR	Roadmap	University of California at San Francisco	1	1	H1	H3K4me3	76	/files/ENCFF405HHM/@@download/ENCFF405HHM.fastq.gz	["ENCSR543PVV"]
ENCSR003SSR	Roadmap	University of California at San Francisco	2	1	H1	H3K4me3	50	/files/ENCFF193VAJ/@@download/ENCFF193VAJ.fastq.gz	["ENCSR543PVV"]
ENCSR012PII	Roadmap	University of Washington	1	2	CD14-positive monocyte	H3K27ac	36	/files/ENCFF765EVS/@@download/ENCFF765EVS.fastq.gz	["ENCSR444GJM"]
ENCSR012PII	Roadmap	University of Washington	1	2	CD14-positive monocyte	H3K27ac	36	/files/ENCFF511CWO/@@download/ENCFF511CWO.fastq.gz	["ENCSR444GJM"]
ENCSR016JWS	ENCODE2	Broad Institute	1	1	mammary epithelial cell	H3K4me3	36	/files/ENCFF174YML/@@download/ENCFF174YML.fastq.gz	["ENCSR000AMN"]
ENCSR016JWS	ENCODE2	Broad Institute	1	1	mammary epithelial cell	H3K4me3	76	/files/ENCFF113ECY/@@download/ENCFF113ECY.fastq.gz	["ENCSR000AMN"]
ENCSR016JWS	ENCODE2	Broad Institute	1	1	mammary epithelial cell	H3K4me3	76	/files/ENCFF904QEC/@@download/ENCFF904QEC.fastq.gz	["ENCSR000AMN"]
ENCSR016JWS	ENCODE2	Broad Institute	2	1	mammary epithelial cell	H3K4me3	76	/files/ENCFF352FFB/@@download/ENCFF352FFB.fastq.gz	["ENCSR000AMN"]
ENCSR016JWS	ENCODE2	Broad Institute	2	1	mammary epithelial cell	H3K4me3	76	/files/ENCFF240ZWX/@@download/ENCFF240ZWX.fastq.gz	["ENCSR000AMN"]
ENCSR019SQX	Roadmap	Broad Institute	1	1	H1	H3K4me3	36	/files/ENCFF296CUY/@@download/ENCFF296CUY.fastq.gz	["ENCSR407ZAC"]
ENCSR019SQX	Roadmap	Broad Institute	2	1	H1	H3K4me3	76	/files/ENCFF739WMB/@@download/ENCFF739WMB.fastq.gz	["ENCSR407ZAC"]
ENCSR080XUB	Roadmap	University of Washington	1	1	CD14-positive monocyte	H3K27me3	36	/files/ENCFF127BPU/@@download/ENCFF127BPU.fastq.gz	["ENCSR444GJM"]
ENCSR170FFQ	Roadmap	University of California at San Diego	1	1	H1	Control	36	/files/ENCFF094GYG/@@download/ENCFF094GYG.fastq.gz	[]
ENCSR186OBR	Roadmap	University of California at San Diego	1	1	H1	H3K27me3	36	/files/ENCFF478FWQ/@@download/ENCFF478FWQ.fastq.gz	["ENCSR985CHJ", "ENCSR569NEE"]
ENCSR186OBR	Roadmap	University of California at San Diego	2	1	H1	H3K27me3	36	/files/ENCFF092MNN/@@download/ENCFF092MNN.fastq.gz	["ENCSR985CHJ", "ENCSR569NEE"]
ENCSR186OBR	Roadmap	University of California at San Diego	2	1	H1	H3K27me3	36	/files/ENCFF908DYY/@@download/ENCFF908DYY.fastq.gz	["ENCSR985CHJ", "ENCSR569NEE"]
ENCSR186OBR	Roadmap	University of California at San Diego	2	1	H1	H3K27me3	36	/files/ENCFF012CJX/@@download/ENCFF012CJX.fastq.gz	["ENCSR985CHJ", "ENCSR569NEE"]
ENCSR186OBR	Roadmap	University of California at San Diego	2	1	H1	H3K27me3	36	/files/ENCFF638SCC/@@download/ENCFF638SCC.fastq.gz	["ENCSR985CHJ", "ENCSR569NEE"]
ENCSR216OGD	Roadmap	Broad Institute	1	1	H1	H3K27me3	76	/files/ENCFF539PKS/@@download/ENCFF539PKS.fastq.gz	["ENCSR407ZAC"]
ENCSR216OGD	Roadmap	Broad Institute	2	1	H1	H3K27me3	36	/files/ENCFF374VEK/@@download/ENCFF374VEK.fastq.gz	["ENCSR407ZAC"]
ENCSR236JVK	Roadmap	University of Washington	1	3	CD14-positive monocyte	H3K9me3	36	/files/ENCFF824UFU/@@download/ENCFF824UFU.fastq.gz	["ENCSR444GJM"]
ENCSR236JVK	Roadmap	University of Washington	1	3	CD14-positive monocyte	H3K9me3	36	/files/ENCFF149RNJ/@@download/ENCFF149RNJ.fastq.gz	["ENCSR444GJM"]
ENCSR236JVK	Roadmap	University of Washington	1	3	CD14-positive monocyte	H3K9me3	36	/files/ENCFF770PRW/@@download/ENCFF770PRW.fastq.gz	["ENCSR444GJM"]
ENCSR244XWL	Roadmap	University of Washington	1	1	CD14-positive monocyte	H3K36me3	36	/files/ENCFF245IDG/@@download/ENCFF245IDG.fastq.gz	["ENCSR444GJM"]
ENCSR271TFS	Roadmap	University of California at San Diego	1	1	H1	H3K4me1	36	/files/ENCFF074BMK/@@download/ENCFF074BMK.fastq.gz	["ENCSR569NEE", "ENCSR985CHJ"]
ENCSR271TFS	Roadmap	University of California at San Diego	2	1	H1	H3K4me1	36	/files/ENCFF719MHS/@@download/ENCFF719MHS.fastq.gz	["ENCSR569NEE", "ENCSR985CHJ"]
ENCSR271TFS	Roadmap	University of California at San Diego	2	1	H1	H3K4me1	36	/files/ENCFF302UMJ/@@download/ENCFF302UMJ.fastq.gz	["ENCSR569NEE", "ENCSR985CHJ"]
ENCSR271TFS	Roadmap	University of California at San Diego	2	1	H1	H3K4me1	36	/files/ENCFF332IMT/@@download/ENCFF332IMT.fastq.gz	["ENCSR569NEE", "ENCSR985CHJ"]
ENCSR301HRV	Roadmap	University of California at San Diego	1	1	H1	H3K79me2	36	/files/ENCFF580OHZ/@@download/ENCFF580OHZ.fastq.gz	["ENCSR814EAU", "ENCSR170FFQ"]
ENCSR301HRV	Roadmap	University of California at San Diego	2	1	H1	H3K79me2	36	/files/ENCFF519ZRJ/@@download/ENCFF519ZRJ.fastq.gz	["ENCSR814EAU", "ENCSR170FFQ"]
ENCSR322MEI	Roadmap	University of California at San Diego	1	1	H1	H3K4me2	36	/files/ENCFF388MXW/@@download/ENCFF388MXW.fastq.gz	["ENCSR569NEE", "ENCSR985CHJ"]
ENCSR322MEI	Roadmap	University of California at San Diego	2	1	H1	H3K4me2	36	/files/ENCFF181QBV/@@download/ENCFF181QBV.fastq.gz	["ENCSR569NEE", "ENCSR985CHJ"]
ENCSR322MEI	Roadmap	University of California at San Diego	2	1	H1	H3K4me2	36	/files/ENCFF095UOK/@@download/ENCFF095UOK.fastq.gz	["ENCSR569NEE", "ENCSR985CHJ"]
ENCSR395USV	Roadmap	University of California at San Francisco	1	1	H1	H3K9me3	76	/files/ENCFF868PQG/@@download/ENCFF868PQG.fastq.gz	["ENCSR543PVV"]
ENCSR395USV	Roadmap	University of California at San Francisco	1	1	H1	H3K9me3	51	/files/ENCFF711AUT/@@download/ENCFF711AUT.fastq.gz	["ENCSR543PVV"]
ENCSR395USV	Roadmap	University of California at San Francisco	1	1	H1	H3K9me3	50	/files/ENCFF320QCI/@@download/ENCFF320QCI.fastq.gz	["ENCSR543PVV"]
ENCSR395USV	Roadmap	University of California at San Francisco	1	1	H1	H3K9me3	76	/files/ENCFF832DCJ/@@download/ENCFF832DCJ.fastq.gz	["ENCSR543PVV"]
ENCSR395USV	Roadmap	University of California at San Francisco	2	2	H1	H3K9me3	76	/files/ENCFF421XOC/@@download/ENCFF421XOC.fastq.gz	["ENCSR543PVV"]
ENCSR395USV	Roadmap	University of California at San Francisco	2	2	H1	H3K9me3	76	/files/ENCFF303XAI/@@download/ENCFF303XAI.fastq.gz	["ENCSR543PVV"]
ENCSR400VWA	Roadmap	University of Washington	1	3	CD14-positive monocyte	H3K4me1	36	/files/ENCFF858VSO/@@download/ENCFF858VSO.fastq.gz	["ENCSR444GJM"]
ENCSR400VWA	Roadmap	University of Washington	1	3	CD14-positive monocyte	H3K4me1	36	/files/ENCFF076WOE/@@download/ENCFF076WOE.fastq.gz	["ENCSR444GJM"]
ENCSR400VWA	Roadmap	University of Washington	1	3	CD14-positive monocyte	H3K4me1	36	/files/ENCFF402BCW/@@download/ENCFF402BCW.fastq.gz	["ENCSR444GJM"]
ENCSR407ZAC	Roadmap	University of California at San Diego	1	1	H1	Control	36	/files/ENCFF634CSE/@@download/ENCFF634CSE.fastq.gz	[]
ENCSR441UHO	Roadmap	University of California at San Diego	1	1	H1	H3K9ac	36	/files/ENCFF779MAL/@@download/ENCFF779MAL.fastq.gz	["ENCSR569NEE", "ENCSR814EAU"]
ENCSR441UHO	Roadmap	University of California at San Diego	2	1	H1	H3K9ac	36	/files/ENCFF586LPF/@@download/ENCFF586LPF.fastq.gz	["ENCSR569NEE", "ENCSR814EAU"]
ENCSR443YAS	Roadmap	University of California at San Diego	1	1	H1	H3K4me3	36	/files/ENCFF038JDF/@@download/ENCFF038JDF.fastq.gz	["ENCSR569NEE", "ENCSR985CHJ"]
ENCSR443YAS	Roadmap	University of California at San Diego	2	1	H1	H3K4me3	36	/files/ENCFF438IKZ/@@download/ENCFF438IKZ.fastq.gz	["ENCSR569NEE", "ENCSR985CHJ"]
ENCSR443YAS	Roadmap	University of California at San Diego	2	1	H1	H3K4me3	36	/files/ENCFF723SKE/@@download/ENCFF723SKE.fastq.gz	["ENCSR569NEE", "ENCSR985CHJ"]
ENCSR444GJM	Roadmap	University of Washington	1	2	CD14-positive monocyte	Control	36	/files/ENCFF825XKT/@@download/ENCFF825XKT.fastq.gz	[]
ENCSR444GJM	Roadmap	University of Washington	1	2	CD14-positive monocyte	Control	36	/files/ENCFF536TAF/@@download/ENCFF536TAF.fastq.gz	[]
ENCSR476KTK	Roadmap	University of California at San Diego	1	1	H1	H3K36me3	36	/files/ENCFF534HXO/@@download/ENCFF534HXO.fastq.gz	["ENCSR569NEE", "ENCSR985CHJ"]
ENCSR476KTK	Roadmap	University of California at San Diego	2	1	H1	H3K36me3	36	/files/ENCFF198FZX/@@download/ENCFF198FZX.fastq.gz	["ENCSR569NEE", "ENCSR985CHJ"]
ENCSR476KTK	Roadmap	University of California at San Diego	2	1	H1	H3K36me3	36	/files/ENCFF764IPK/@@download/ENCFF764IPK.fastq.gz	["ENCSR569NEE", "ENCSR985CHJ"]
ENCSR476KTK	Roadmap	University of California at San Diego	2	1	H1	H3K36me3	36	/files/ENCFF458WNH/@@download/ENCFF458WNH.fastq.gz	["ENCSR569NEE", "ENCSR985CHJ"]
ENCSR476KTK	Roadmap	University of California at San Diego	2	1	H1	H3K36me3	36	/files/ENCFF685HBP/@@download/ENCFF685HBP.fastq.gz	["ENCSR569NEE", "ENCSR985CHJ"]
ENCSR476KTK	Roadmap	University of California at San Diego	2	1	H1	H3K36me3	36	/files/ENCFF203VOI/@@download/ENCFF203VOI.fastq.gz	["ENCSR569NEE", "ENCSR985CHJ"]
ENCSR496DCY	Roadmap	University of California at San Francisco	1	1	H1	H3K36me3	76	/files/ENCFF590KVU/@@download/ENCFF590KVU.fastq.gz	["ENCSR543PVV"]
ENCSR496DCY	Roadmap	University of California at San Francisco	1	1	H1	H3K36me3	76	/files/ENCFF037BES/@@download/ENCFF037BES.fastq.gz	["ENCSR543PVV"]
ENCSR496DCY	Roadmap	University of California at San Francisco	2	2	H1	H3K36me3	76	/files/ENCFF929REJ/@@download/ENCFF929REJ.fastq.gz	["ENCSR543PVV"]
ENCSR496DCY	Roadmap	University of California at San Francisco	2	2	H1	H3K36me3	76	/files/ENCFF659PKA/@@download/ENCFF659PKA.fastq.gz	["ENCSR543PVV"]
ENCSR543PVV	Roadmap	University of California at San Francisco	2	3	H1	Control	76	/files/ENCFF202IDR/@@download/ENCFF202IDR.fastq.gz	[]
ENCSR543PVV	Roadmap	University of California at San Francisco	2	3	H1	Control	76	/files/ENCFF791VTH/@@download/ENCFF791VTH.fastq.gz	[]
ENCSR543PVV	Roadmap	University of California at San Francisco	2	3	H1	Control	51	/files/ENCFF610XLV/@@download/ENCFF610XLV.fastq.gz	[]
ENCSR543PVV	Roadmap	University of California at San Francisco	1	1	H1	Control	76	/files/ENCFF451EVC/@@download/ENCFF451EVC.fastq.gz	[]
ENCSR543PVV	Roadmap	University of California at San Francisco	1	1	H1	Control	75	/files/ENCFF422GYG/@@download/ENCFF422GYG.fastq.gz	[]
ENCSR569NEE	Roadmap	University of California at San Diego	2	1	H1	Control	36	/files/ENCFF051RXP/@@download/ENCFF051RXP.fastq.gz	[]
ENCSR569NEE	Roadmap	University of California at San Diego	2	1	H1	Control	36	/files/ENCFF176RJQ/@@download/ENCFF176RJQ.fastq.gz	[]
ENCSR571IIS	Roadmap	University of California at San Diego	1	1	H1	H2AFZ	50	/files/ENCFF820FVP/@@download/ENCFF820FVP.fastq.gz	["ENCSR697DAD"]
ENCSR631RJR	Roadmap	Broad Institute	1	1	H1	H3K4me1	36	/files/ENCFF841YYX/@@download/ENCFF841YYX.fastq.gz	["ENCSR407ZAC"]
ENCSR631RJR	Roadmap	Broad Institute	2	1	H1	H3K4me1	51	/files/ENCFF713WZR/@@download/ENCFF713WZR.fastq.gz	["ENCSR407ZAC"]
ENCSR668LDD	ENCODE3	Broad Institute	1	1	K562	H3K4me3	76	/files/ENCFF894KBP/@@download/ENCFF894KBP.fastq.gz	["ENCSR000AKY"]
ENCSR668LDD	ENCODE3	Broad Institute	2	1	K562	H3K4me3	76	/files/ENCFF010SAE/@@download/ENCFF010SAE.fastq.gz	["ENCSR000AKY"]
ENCSR687FDK	Roadmap	University of California at San Francisco	1	1	H1	H3K27me3	50	/files/ENCFF092CMH/@@download/ENCFF092CMH.fastq.gz	["ENCSR543PVV"]
ENCSR687FDK	Roadmap	University of California at San Francisco	1	1	H1	H3K27me3	76	/files/ENCFF717YEM/@@download/ENCFF717YEM.fastq.gz	["ENCSR543PVV"]
ENCSR697DAD	Roadmap	University of California at San Diego	1	1	H1	Control	30	/files/ENCFF693FJC/@@download/ENCFF693FJC.fastq.gz	[]
ENCSR697DAD	Roadmap	University of California at San Diego	1	1	H1	Control	30	/files/ENCFF454ZHO/@@download/ENCFF454ZHO.fastq.gz	[]
ENCSR796FCS	Roadmap	University of Washington	1	2	CD14-positive monocyte	H3K4me3	36	/files/ENCFF820FZP/@@download/ENCFF820FZP.fastq.gz	["ENCSR444GJM"]
ENCSR796FCS	Roadmap	University of Washington	1	2	CD14-positive monocyte	H3K4me3	36	/files/ENCFF992EVR/@@download/ENCFF992EVR.fastq.gz	["ENCSR444GJM"]
ENCSR813CTI	Roadmap	University of California at San Francisco	1	1	H1	H3K9ac	50	/files/ENCFF888QAU/@@download/ENCFF888QAU.fastq.gz	["ENCSR543PVV"]
ENCSR814EAU	Roadmap	University of California at San Diego	1	1	H1	Control	36	/files/ENCFF835IOE/@@download/ENCFF835IOE.fastq.gz	[]
ENCSR814XPE	ENCODE3	Broad Institute	1	1	H1	H3K4me3	36	/files/ENCFF156FYC/@@download/ENCFF156FYC.fastq.gz	["ENCSR000AMI"]
ENCSR814XPE	ENCODE3	Broad Institute	2	1	H1	H3K4me3	36	/files/ENCFF654NIP/@@download/ENCFF654NIP.fastq.gz	["ENCSR000AMI"]
ENCSR814XPE	ENCODE3	Broad Institute	2	2	H1	H3K4me3	36	/files/ENCFF813UAU/@@download/ENCFF813UAU.fastq.gz	["ENCSR000AMI"]
ENCSR880SUY	Roadmap	University of California at San Diego	1	2	H1	H3K27ac	30	/files/ENCFF692HWE/@@download/ENCFF692HWE.fastq.gz	["ENCSR985CHJ", "ENCSR569NEE"]
ENCSR880SUY	Roadmap	University of California at San Diego	2	1	H1	H3K27ac	36	/files/ENCFF481YKF/@@download/ENCFF481YKF.fastq.gz	["ENCSR985CHJ", "ENCSR569NEE"]
ENCSR880SUY	Roadmap	University of California at San Diego	2	1	H1	H3K27ac	36	/files/ENCFF308XJC/@@download/ENCFF308XJC.fastq.gz	["ENCSR985CHJ", "ENCSR569NEE"]
ENCSR883AQJ	Roadmap	University of California at San Diego	1	2	H1	H3K9me3	36	/files/ENCFF546MTH/@@download/ENCFF546MTH.fastq.gz	["ENCSR985CHJ", "ENCSR569NEE"]
ENCSR883AQJ	Roadmap	University of California at San Diego	1	2	H1	H3K9me3	36	/files/ENCFF699FAQ/@@download/ENCFF699FAQ.fastq.gz	["ENCSR985CHJ", "ENCSR569NEE"]
ENCSR883AQJ	Roadmap	University of California at San Diego	1	2	H1	H3K9me3	36	/files/ENCFF298XWU/@@download/ENCFF298XWU.fastq.gz	["ENCSR985CHJ", "ENCSR569NEE"]
ENCSR883AQJ	Roadmap	University of California at San Diego	1	2	H1	H3K9me3	36	/files/ENCFF084JSH/@@download/ENCFF084JSH.fastq.gz	["ENCSR985CHJ", "ENCSR569NEE"]
ENCSR883AQJ	Roadmap	University of California at San Diego	3	2	H1	H3K9me3	36	/files/ENCFF214DMX/@@download/ENCFF214DMX.fastq.gz	["ENCSR985CHJ", "ENCSR569NEE"]
ENCSR883AQJ	Roadmap	University of California at San Diego	3	1	H1	H3K9me3	36	/files/ENCFF557QCN/@@download/ENCFF557QCN.fastq.gz	["ENCSR985CHJ", "ENCSR569NEE"]
ENCSR925LJZ	Roadmap	Broad Institute	1	1	H1	H3K36me3	36	/files/ENCFF034AQJ/@@download/ENCFF034AQJ.fastq.gz	["ENCSR407ZAC"]
ENCSR925LJZ	Roadmap	Broad Institute	2	1	H1	H3K36me3	36	/files/ENCFF759KCC/@@download/ENCFF759KCC.fastq.gz	["ENCSR407ZAC"]
ENCSR928HYM	Roadmap	University of California at San Diego	1	2	H1	H3K27me3	36	/files/ENCFF722IIA/@@download/ENCFF722IIA.fastq.gz	["ENCSR569NEE", "ENCSR985CHJ"]
ENCSR928HYM	Roadmap	University of California at San Diego	1	2	H1	H3K27me3	36	/files/ENCFF137PVL/@@download/ENCFF137PVL.fastq.gz	["ENCSR569NEE", "ENCSR985CHJ"]
ENCSR928HYM	Roadmap	University of California at San Diego	2	1	H1	H3K27me3	36	/files/ENCFF171DUV/@@download/ENCFF171DUV.fastq.gz	["ENCSR569NEE", "ENCSR985CHJ"]
ENCSR952GVX	Roadmap	Broad Institute	1	1	H1	H3K9ac	36	/files/ENCFF168NRP/@@download/ENCFF168NRP.fastq.gz	["ENCSR407ZAC"]
ENCSR952GVX	Roadmap	Broad Institute	2	1	H1	H3K9ac	36	/files/ENCFF181TET/@@download/ENCFF181TET.fastq.gz	["ENCSR407ZAC"]
ENCSR985CHJ	Roadmap	University of California at San Diego	1	1	H1	Control	36	/files/ENCFF126XLK/@@download/ENCFF126XLK.fastq.gz	[]
ENCSR991BTY	Roadmap	University of California at San Francisco	1	1	H1	H3K4me1	76	/files/ENCFF355BBC/@@download/ENCFF355BBC.fastq.gz	["ENCSR543PVV"]
